# Supplementary material for: Dual-emissive phenylalanine dehydrogenase-templated gold nanoclusters as a new highly sensitive label-free ratiometric fluorescent probe: heavy metal ions and thiols measurement with live-cell imaging
Source: Royal Society of Chemistry journal article supplement (doi:10.1039/d3ra03179a), 2023-01-01
Supplement: d3ra03179a1.pdf [file d3ra03179a1.pdf]

## Electronic Supplementary Information

### **Dual-Emissive Phenylalanine Dehydrogenase-Templated Gold Nanoclusters as a New Highly Sensitive Label-Free Ratiometric Fluorescent Probe: Heavy Metal Ions and Thiols measurement with Live-Cell Imaging**

Mahsa Shahrashoob<sup>a</sup>, Saman Hosseinkhani\*<sup>b</sup>, Hanieh Jafary<sup>a</sup>, Morteza Hosseini<sup>c</sup>, Fatemeh Molaabasi<sup>d</sup>

<sup>a</sup> Department of Biology, Science and Research Branch, Islamic Azad University, Tehran, Iran

<sup>b</sup> Department of Biochemistry, Faculty of Biological Sciences, Tarbiat Modares University, Tehran, Iran

<sup>c</sup> Department of Life Science Engineering, Faculty of New Sciences & Technologies, University of Tehran, Tehran, Iran

<sup>d</sup> Department of Interdisciplinary Technologies, Breast Cancer Research Center, Biomaterials and Tissue Engineering Research Group, Motamed Cancer Institute, ACECR, Tehran, Iran

\* Corresponding Author: Professor Saman Hosseinkhani

E-mail: [saman\\_h@modares.ac.ir](mailto:saman_h@modares.ac.ir)

## Expression and purification of Phenylalanine dehydrogenase enzyme

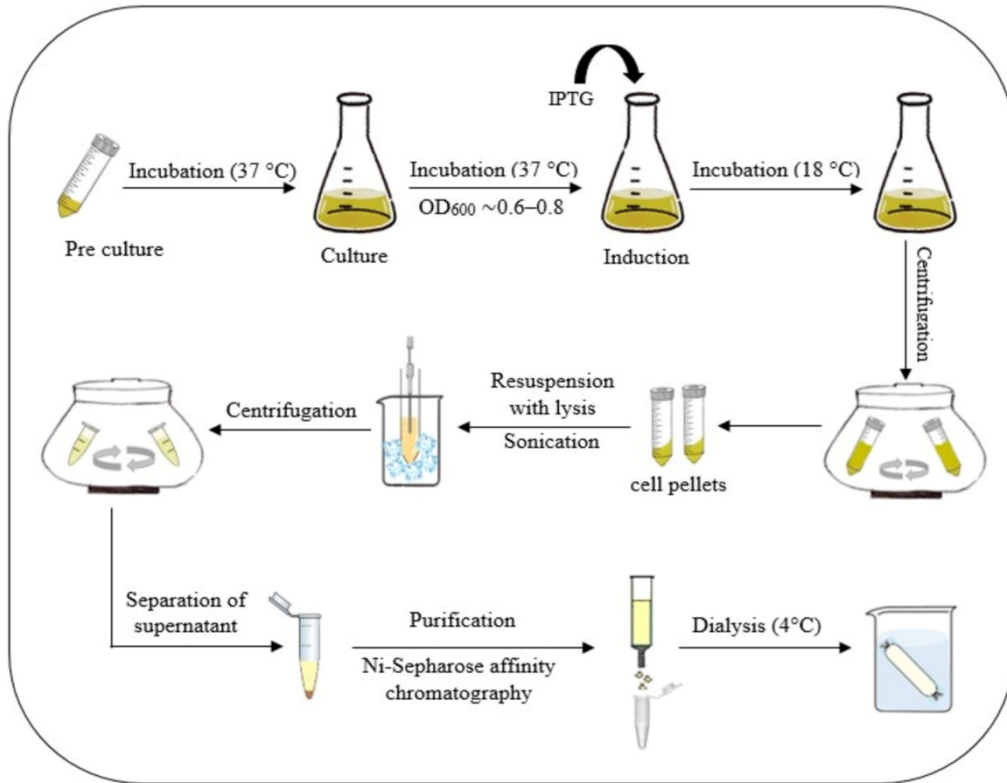

**Figure S1.** Schematic illustration of the expression and purification steps of the recombinant histidine-tailed PheDH.

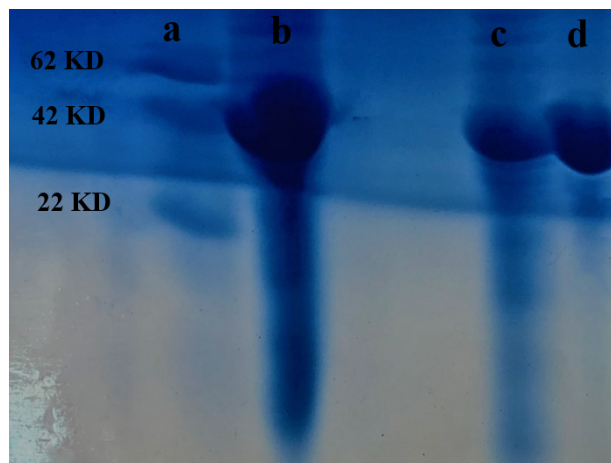

**Figure S2.** SDS-PAGE analysis of *B. badius* PheDH. (a) Protein marker, (b) bacterial flow soup, (c) washing step and (4) final eluted fractions.

### PheDH-capped AuNCs: Optimization and Characterization of the PheDH-AuNCs

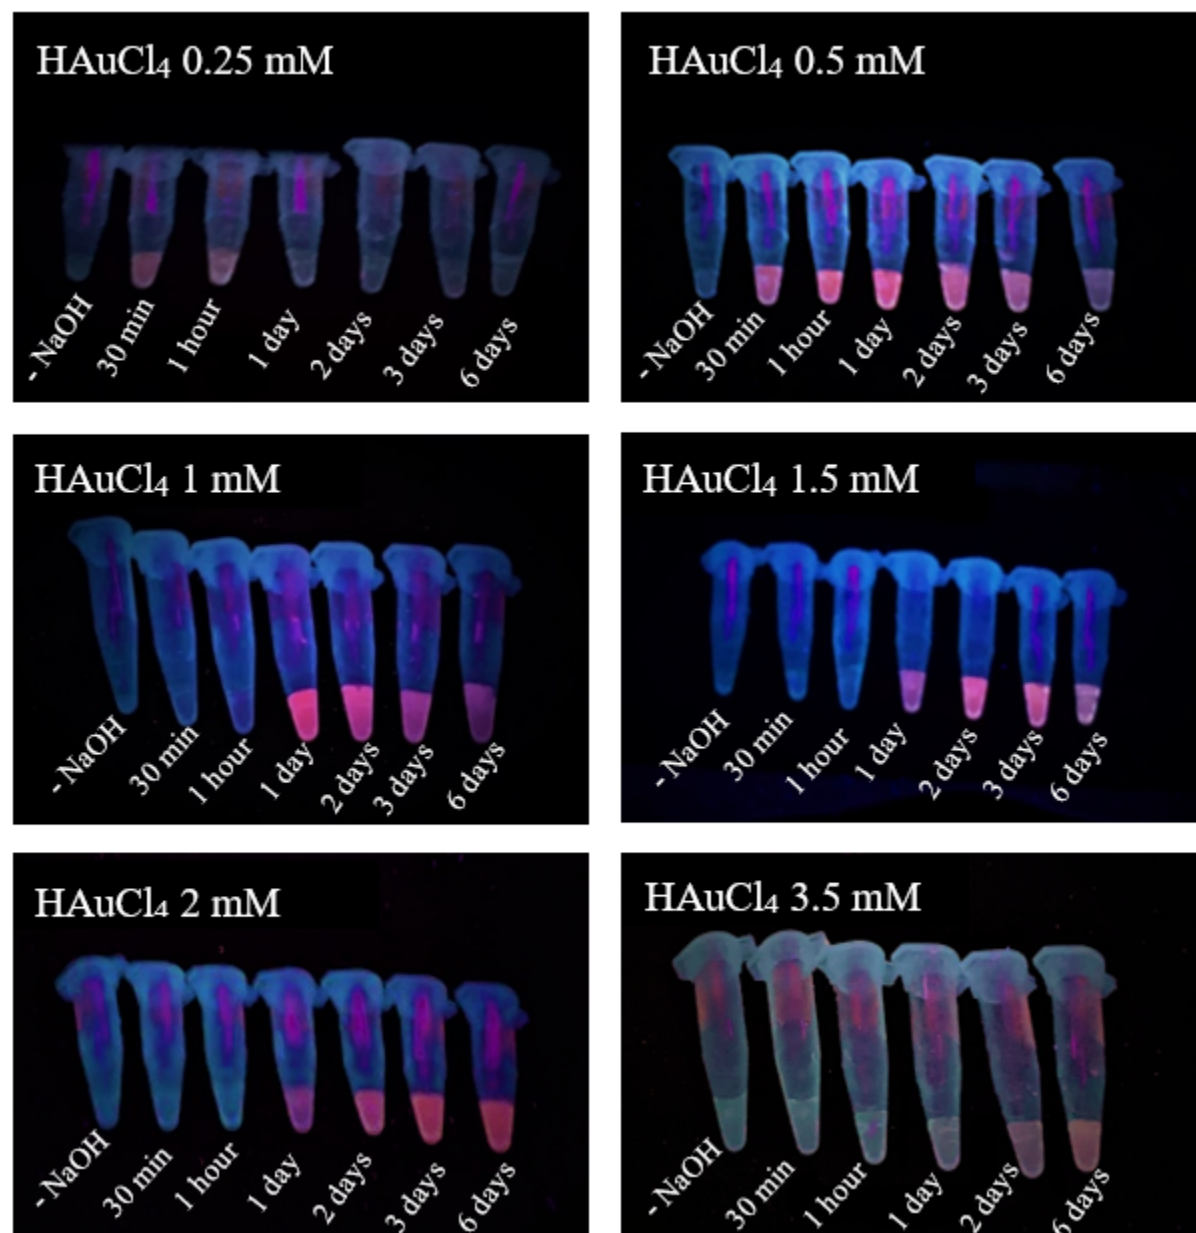

**Figure S3.** Photographs of the PheDH-AuNCs aqueous solutions at constant concentration of PheDH ( $4.5 \text{ mg ml}^{-1}$ ) and different concentrations of HAuCl<sub>4</sub> at different reaction times under UV light.

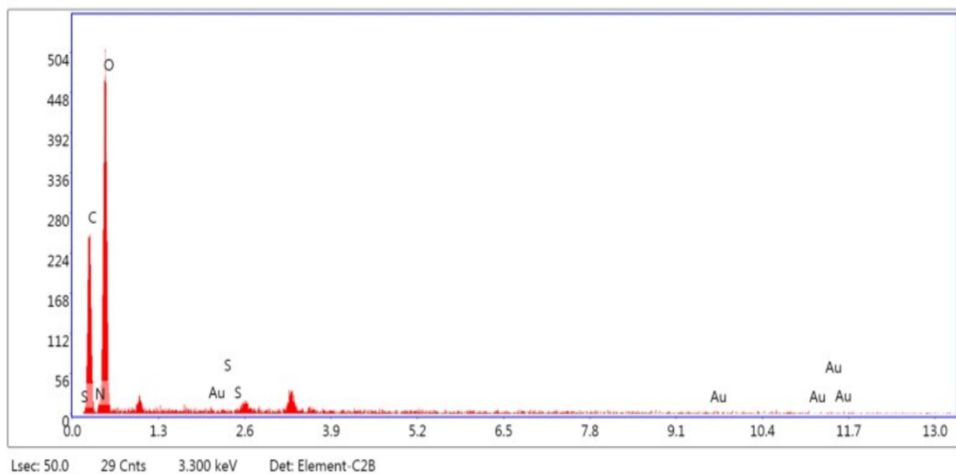

**Figure S4.** EDAX spectra of the PheDH-AuNCs.

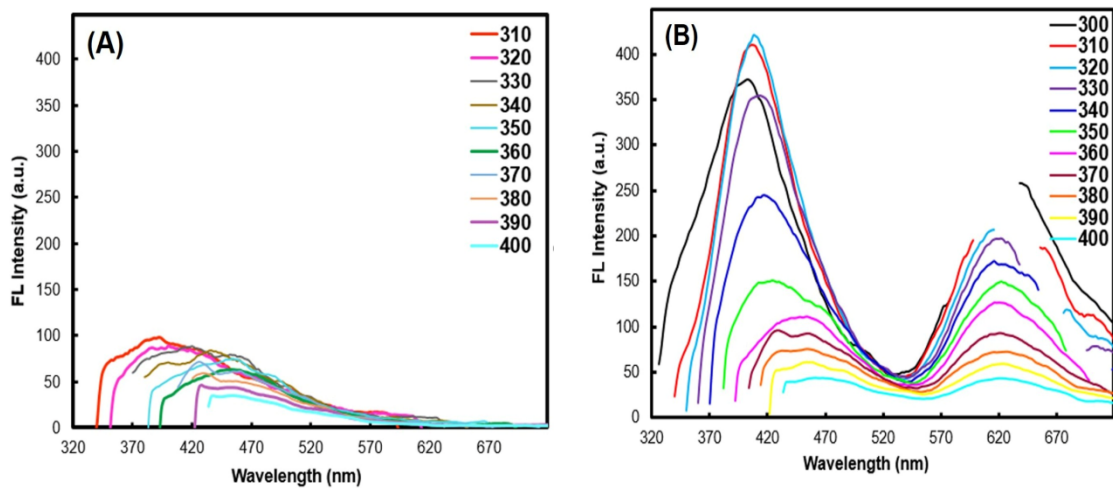

**Figure S5.** Fluorescence spectra of (A) PheDH enzyme and (B) PheDH-AuNCs recorded at different excitation wavelengths.
